# Supplementary material for: A novel bispecific c-MET/CTLA-4 antibody targetting lung cancer stem cell-like cells with therapeutic potential in human non-small-cell lung cancer
Source: Oxford University Press journal article supplement (doi:10.1042/bsr20171278), 2017-11-30
Supplement: bsr-2017-1278_supp.pdf [file bsr-2017-1278_supp.pdf]

## Supplemental Information

### A novel bispecific c-MET/CTLA-4 antibody targeting lung cancer stem cell-like cells with therapeutic potential in human non-small cell lung cancer

Jian-feng Li<sup>1+</sup>, Yuan-yuan Niu<sup>2+</sup>, Yan-li Xing<sup>2</sup>, Feng Liu<sup>3\*</sup>

<sup>1</sup> Department of Radiation Oncology, The First Affiliated Hospital, Guangzhou Medical University, Guangzhou, 510180, Guangdong Province, People's Republic of China

<sup>2</sup> Department of Respiratory Medicine, The Eastern Hospital of The First Affiliated Hospital, Sun Yat-sen University, Guangzhou, 510180, Guangdong Province, People's Republic of China

<sup>3</sup> Department of Geriatrics, National Key Clinical Specialty, Guangzhou First People's Hospital, Guangzhou Medical University, Guangzhou, 510180, Guangdong Province, People's Republic of China

\* **Correspondence:** Feng Liu, Department of Geriatrics, National Key Clinical Specialty, Guangzhou First People's Hospital, Guangzhou Medical University, No. 1, Fupan Road, Guangzhou, 510180, Guangdong Province, People's Republic of China.

Telephone: 020-81048559; Fax: 020-81048559; email:

<sup>+</sup> Jian-feng Li and Yuan-yuan Niu contributed equally to this work.

**Table S1. Expression of CD166, CTLA-4 and c-MET in NSCLC samples**

| Case | Age | TNM    | Clinical stage | Percentage of CD166 <sup>+</sup> cells | <sup>a</sup> Normalized CTLA-4 amount $2^{-\Delta\Delta Ct}$ | <sup>a</sup> Normalized c-MET amount $2^{-\Delta\Delta Ct}$ | Sphere formation |
|------|-----|--------|----------------|----------------------------------------|--------------------------------------------------------------|-------------------------------------------------------------|------------------|
| 1    | 42  | T1N0M0 | IA             | 0.1%                                   | 3.3600                                                       | 2.3657                                                      | No               |
| 2    | 35  | T2N0M0 | IB             | 0.3%                                   | 4.3423                                                       | 5.2657                                                      | Yes              |
| 3    | 54  | T1N1M0 | IIA            | 0.6%                                   | 3.2454                                                       | 3.2147                                                      | Yes              |
| 4    | 36  | T2N1M0 | IIA            | 0.7%                                   | 5.5938                                                       | 4.1139                                                      | Yes              |
| 5    | 57  | T2N2M0 | IIB            | 1.1%                                   | 3.3579                                                       | 2.4876                                                      | Yes              |
| 6    | 45  | T3N0M0 | IIIA           | 1.2%                                   | 4.2974                                                       | 3.2014                                                      | Yes              |
| 7    | 48  | T3N3M1 | IV             | 0.8%                                   | 2.4732                                                       | 3.1584                                                      | Yes              |
| 8    | 37  | T2N2M0 | IIIA           | 0.3%                                   | 3.4923                                                       | 4.6957                                                      | Yes              |
| 9    | 46  | T2N0M0 | IB             | 0.5%                                   | 1.9832                                                       | 6.3952                                                      | Yes              |
| 10   | 61  | T2N3M0 | IIIB           | 0.9%                                   | 5.0394                                                       | 5.3461                                                      | Yes              |

<sup>a</sup> Relative quantification was performed by the  $2^{-\Delta\Delta Ct}$  method with the adjacent lung tissue sample as a calibrator. Data show the means from three independent analyses. Every independent analysis

was carried out after the RNA extraction step. Total RNA was poly-A tailed, reverse transcript, and then real-time PCR tested.  $\Delta C_T$  obtained from real-time PCR was subject to paired t-test ( $\Delta C_T = C_{T \text{ CTLA-4/c-MET}} - C_{T \beta\text{-actin}}$ ). The expression levels of CTLA-4/c-MET in tumor tissues were significantly higher than normal tissues ( $P < 0.01$ )

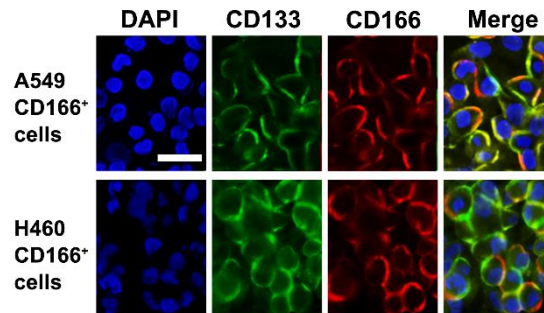

Figure S1, Expression of CD133 in CD166<sup>+</sup> spheres by immunofluorescence staining. Scale bar, 100 mm.

**Table S2. The affinity and specificity of BsAb-5**

| ID     | Epitope group | Competitive Fab ELISA |        |        | EC50 (nM) | SPR (KD) |
|--------|---------------|-----------------------|--------|--------|-----------|----------|
|        |               | 0 nM                  | 50 nM  | 5 nM   |           |          |
| BsAb-5 | A             | 100.00%               | 17.83% | 63.21% | 17.91     | 1.79E-09 |
